# Supplementary material
Source: PubMed Central journal article supplement (PMC7657208)
Supplement: CAS-104-360-s001.pdf [file CAS-104-360-s001.pdf]

# Supplementary Fig. S1

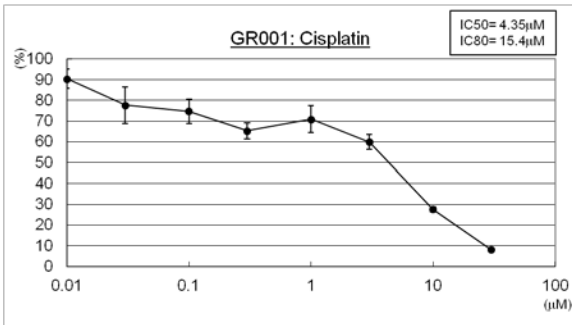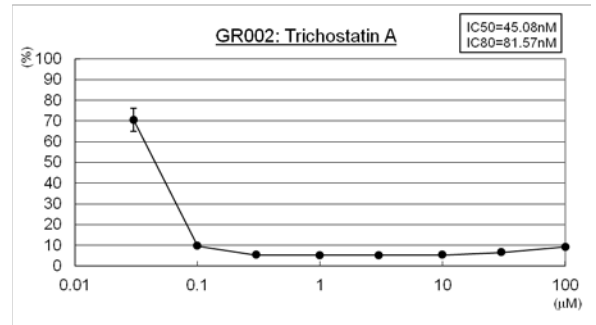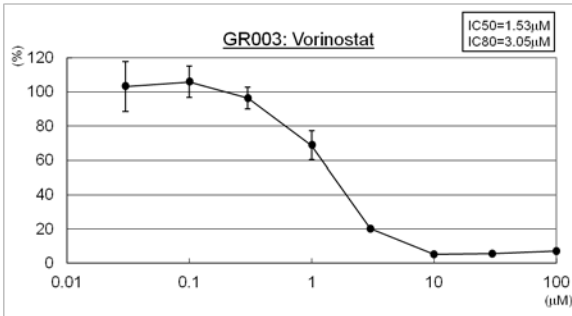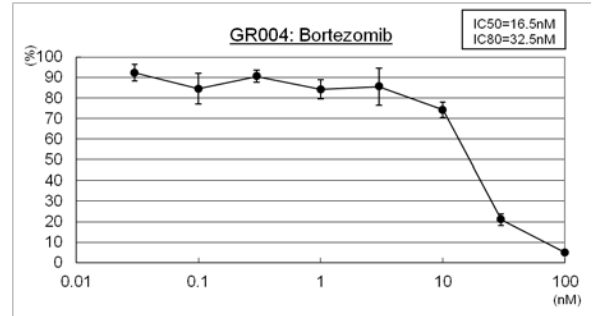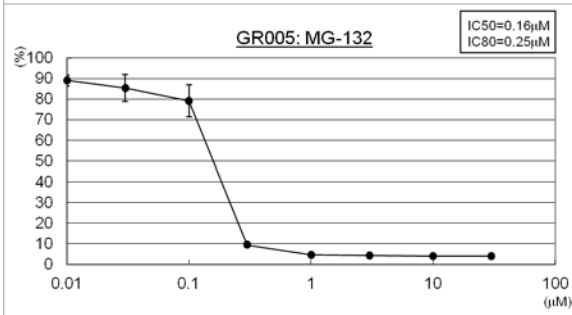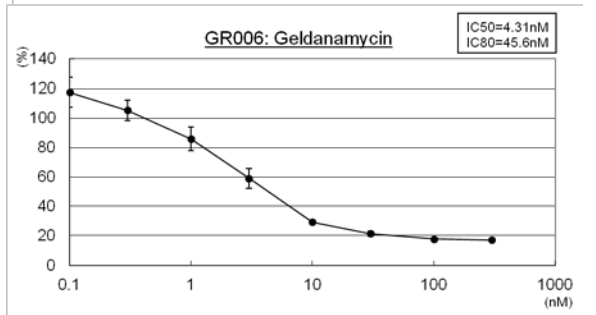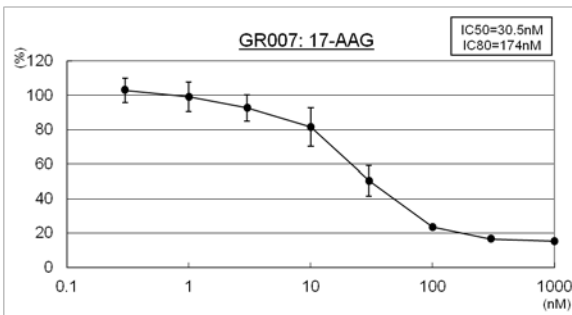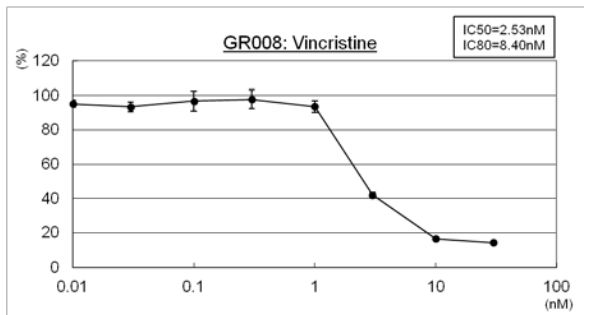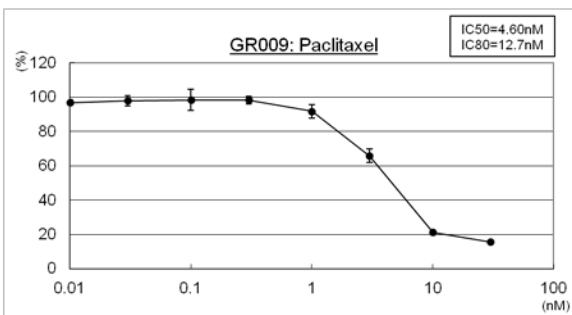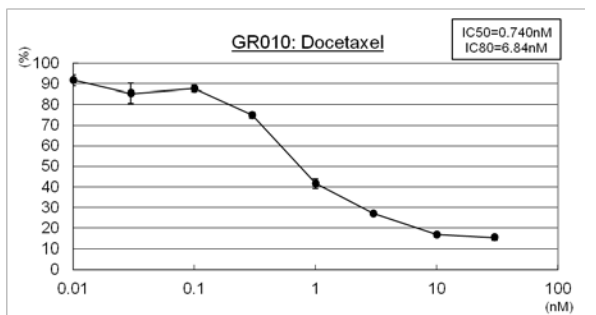

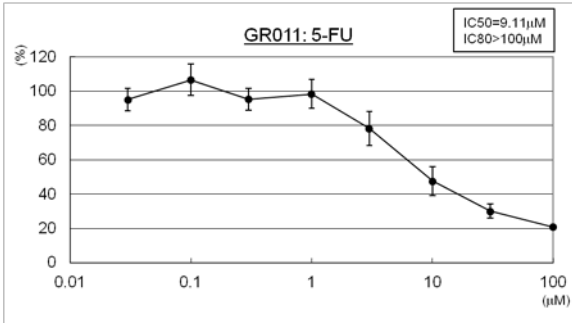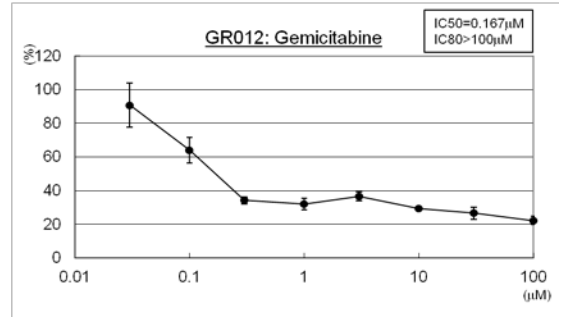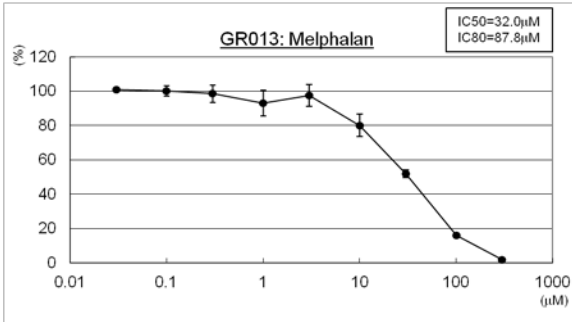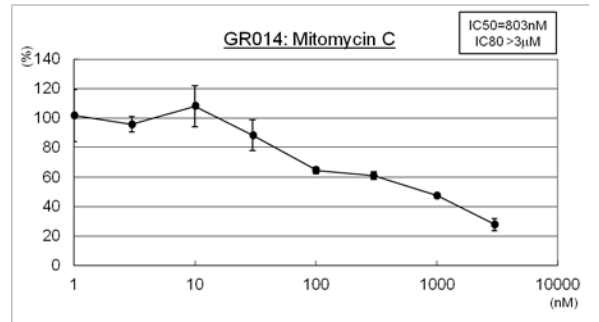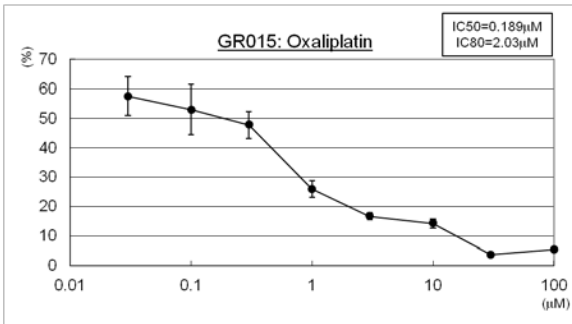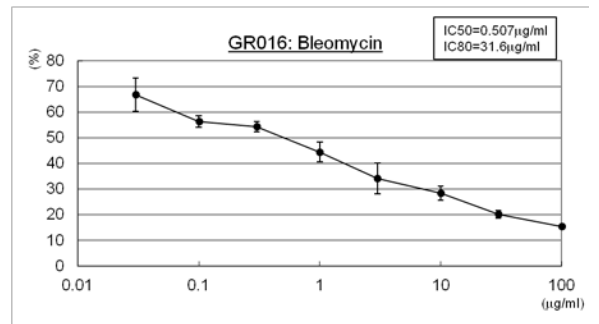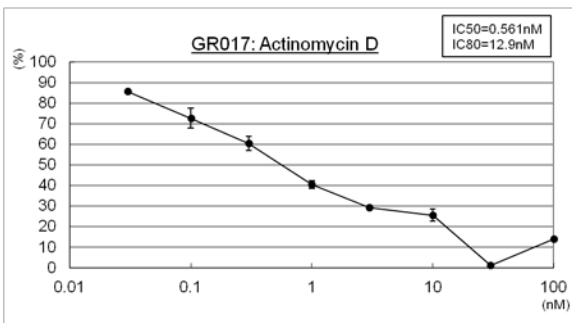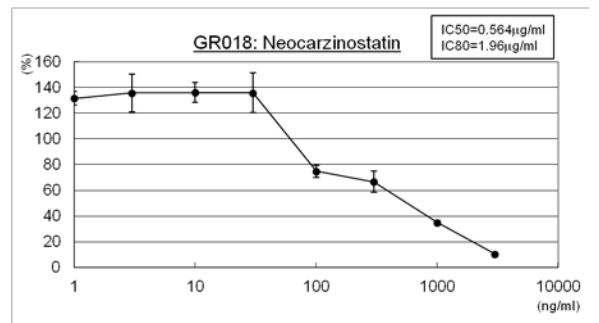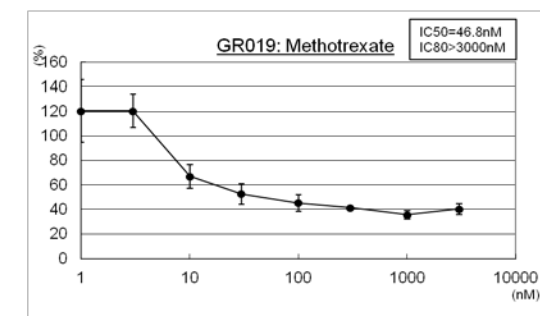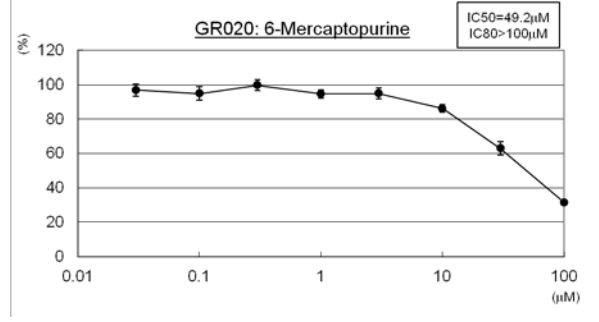

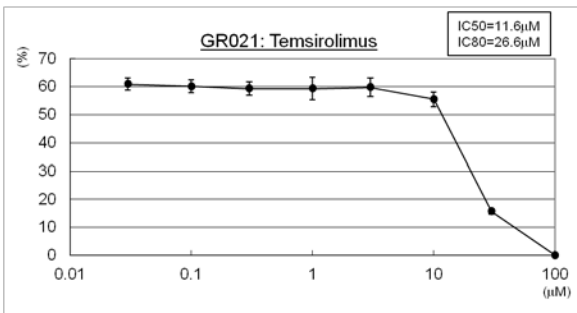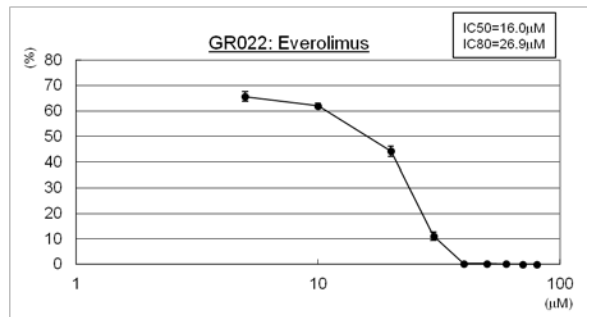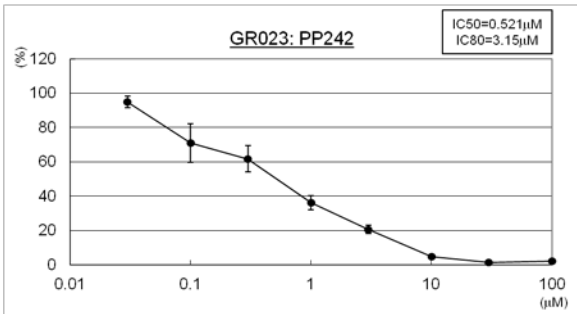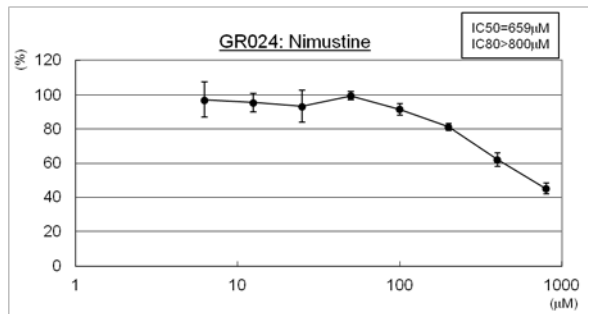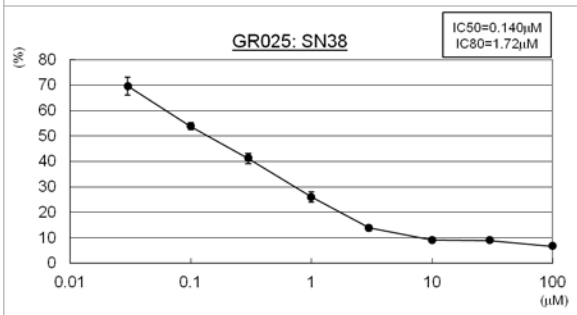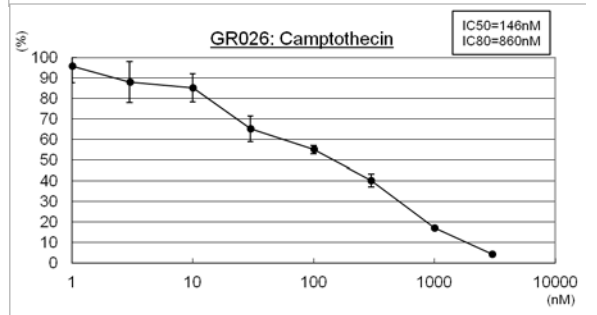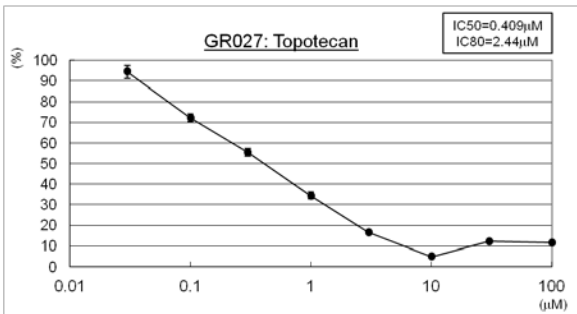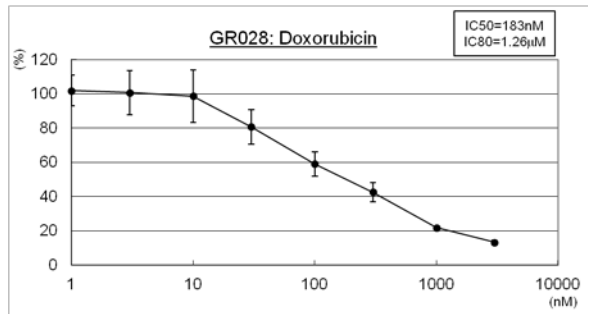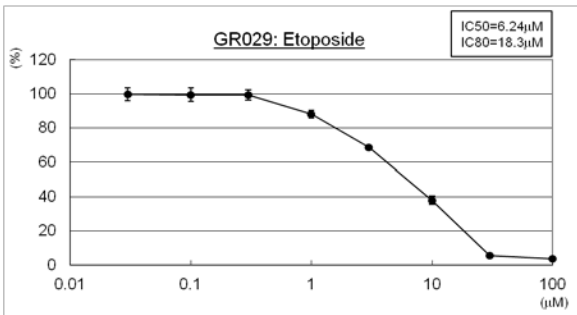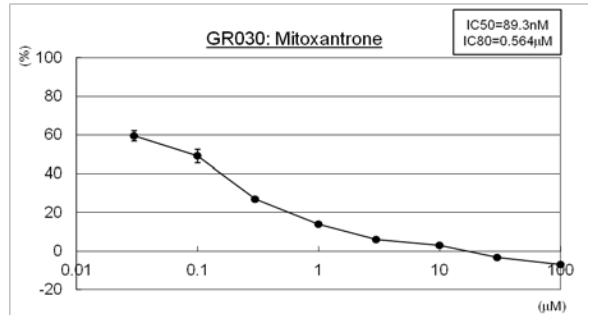

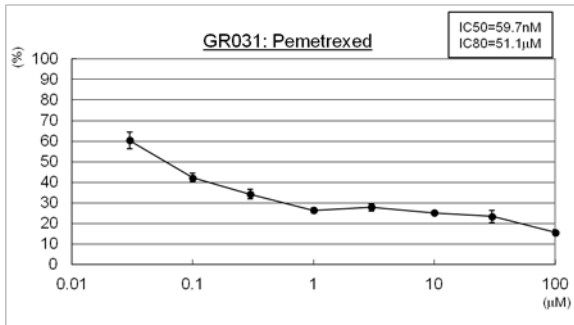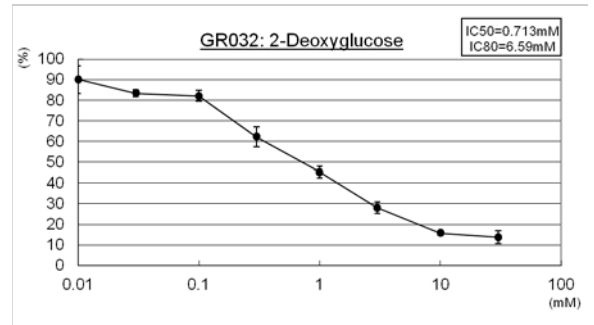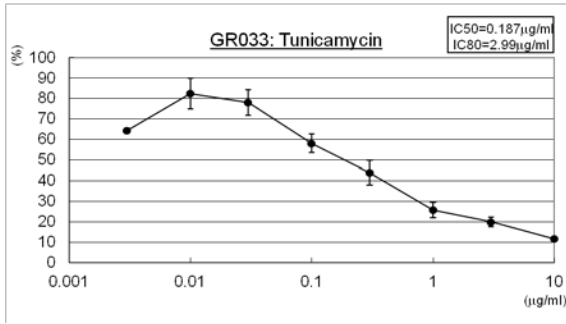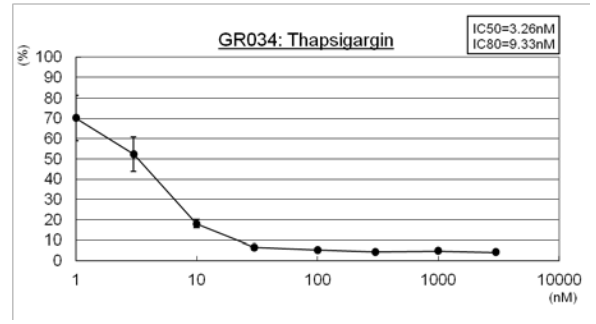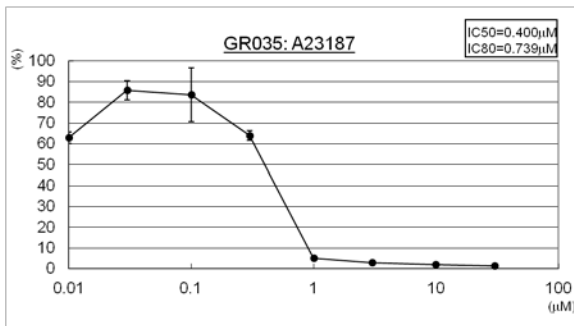

Supplementary Fig. S1: Dose-response curves for 35 anticancer compounds. Experiments were replicated four times for each compound and the average growth inhibitions were plotted. IC50 and IC80 values were estimated by using linear regression models.
