# Supplementary material
Source: PubMed Central journal article supplement (PMC7657208)
Supplement: CAS-104-360-s002.pdf [file CAS-104-360-s002.pdf]

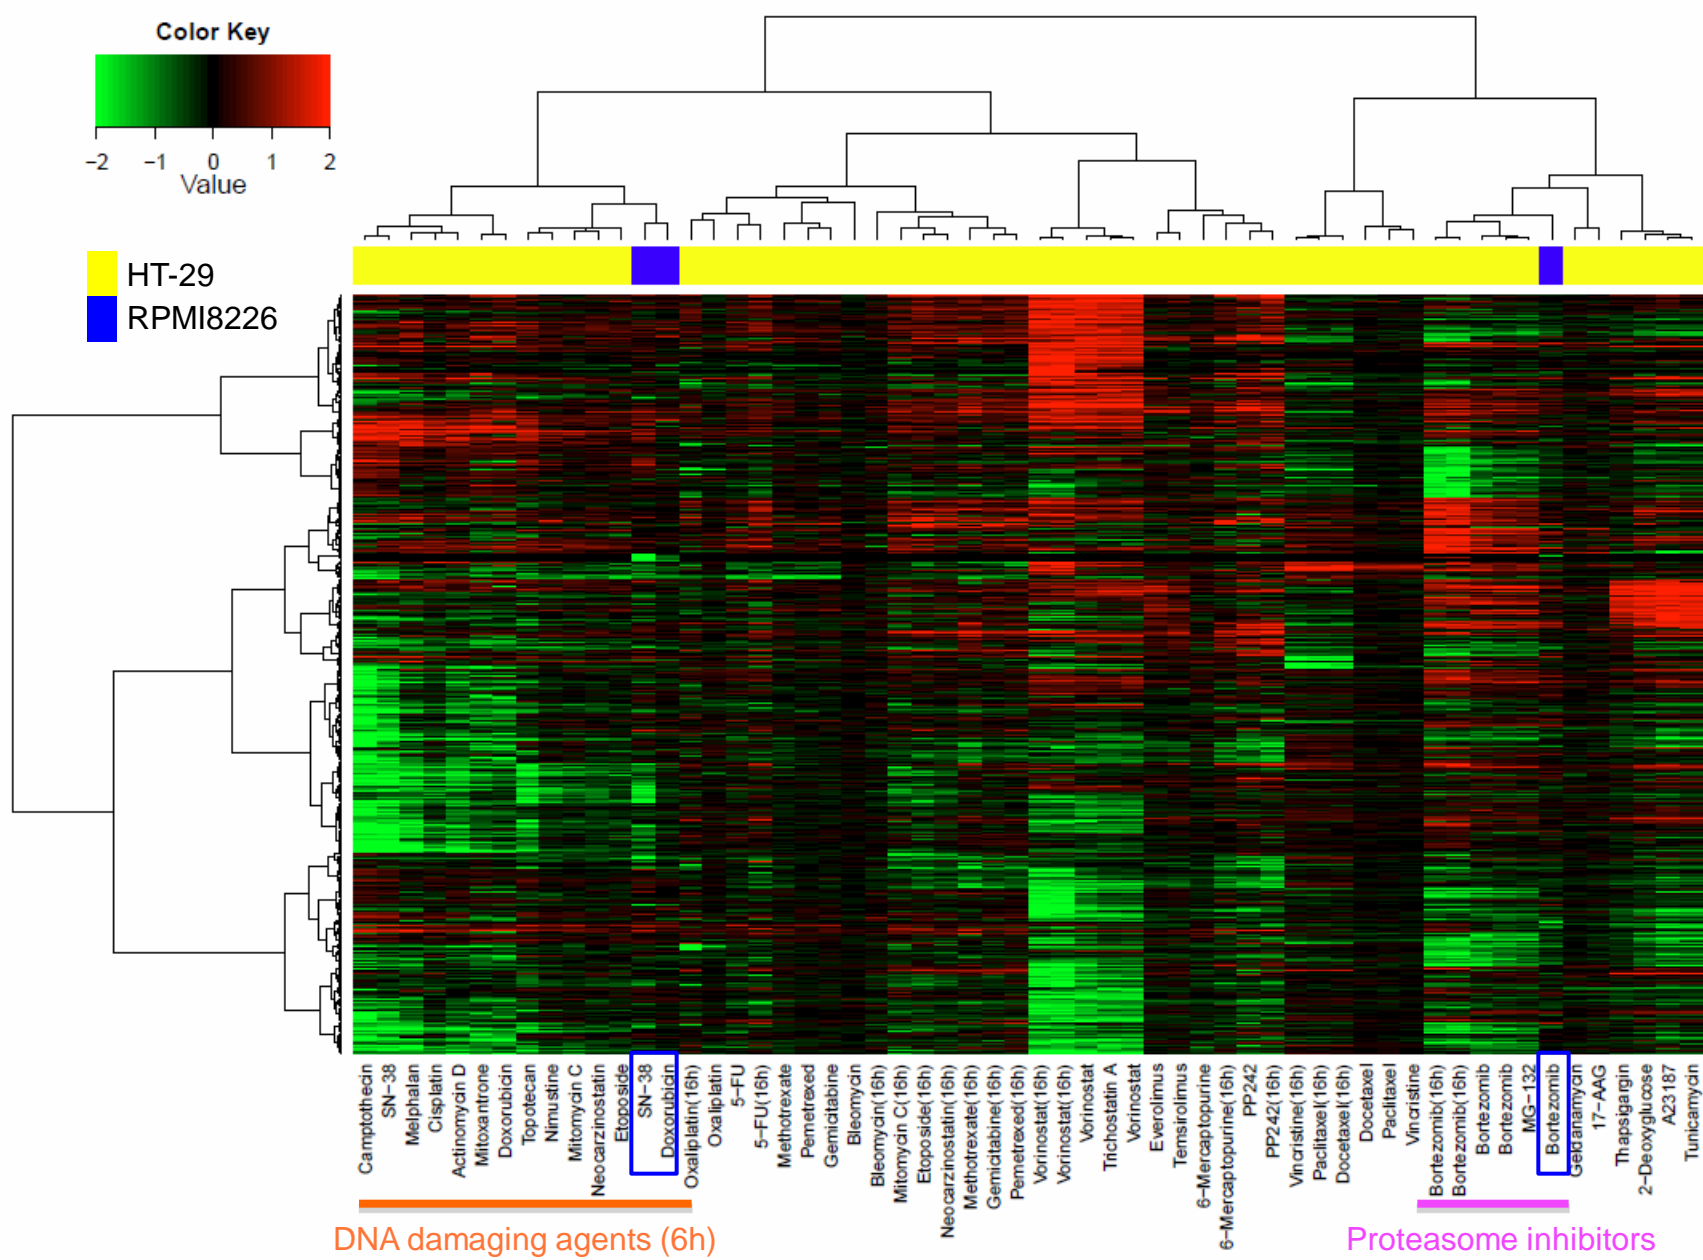

Supplementary Fig. S2: Hierarchical cluster analysis including the RPMI8226 cell line data. The analysis was based on the 3237 probe sets used in Fig.1. RPMI8226 cell line data exposed by three compounds are included. To obtain the RPMI8226 cell line data, we cultured the cells in RPMI-10%FBS and the cells were treated for 6h with Bortezomib (10nM), SN-38 (1 $\mu$ M) or Doxorubicin (0.3  $\mu$ M) .
